# Supplementary material for: Validation of Twitter opinion trends with national polling aggregates: Hillary Clinton vs Donald Trump
Source: Springer Nature journal article supplement (doi:10.1038/s41598-018-26951-y), 2018-05-31
Supplement: MOESM1 [file 41598_2018_26951_MOESM1_ESM.pdf]

## Validation of Twitter opinion trends with national polling aggregates: Hillary Clinton vs Donald Trump

### Supplementary Information

**Alexandre Bovet<sup>1</sup>, Flaviano Morone<sup>1</sup>, and Hernán A. Makse<sup>1,\*</sup>**

<sup>1</sup>Levich Institute and Physics Department, City College of New York, New York, New York 10031, USA

\*hmakse@lev.ccny.cuny.edu

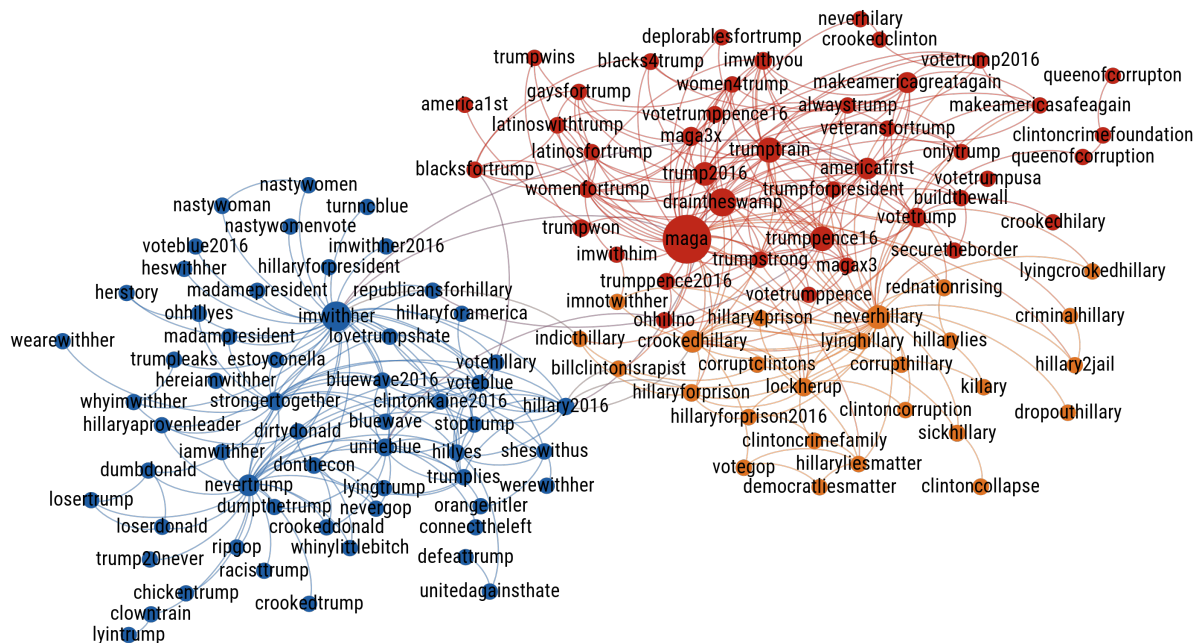

**Figure S1. Hashtag classification via network of co-occurrence for September 1st to November 8th.**

Network of hashtags obtained by our algorithm from September 1st to November 8th. Nodes of the network represent hashtags and an edge is drawn between two hashtags when their co-occurrence in tweets is significant. The size of the node is proportional to the total number of occurrence of the hashtag. Similarly to the network for June 1st to September 1st (Fig. 2 in the main paper), two main clusters are visible, corresponding to the Pro-Trump/Anti-Clinton and Pro-Clinton/Anti-Trump hashtags. Inside of these two clusters, the separation between Pro-Trump (red) and Anti-Clinton (orange) is visible and the Pro-Clinton and Anti-Trump form a single cluster (blue). The coloring corresponds to clusters found by community detection.

| client name                 | number of tweets |
|-----------------------------|------------------|
| Twitter for iPhone          | 60 119 804       |
| Twitter for Android         | 39 391 345       |
| Twitter Web Client          | 36 416 726       |
| Twitter for iPad            | 11 563 812       |
| Mobile Web (M5)             | 3 680 822        |
| TweetDeck                   | 2 310 956        |
| Facebook                    | 1 228 664        |
| Twitter for Windows         | 690 012          |
| Mobile Web (M2)             | 629 098          |
| Twitter for Windows Phone   | 540 218          |
| Mobile Web                  | 442 489          |
| Google                      | 403 207          |
| Twitter for BlackBerry      | 279 754          |
| Twitter for Android Tablets | 186 652          |
| Twitter for Mac             | 158 318          |
| iOS                         | 101 666          |
| Twitter for BlackBerry®     | 68 379           |

**Table S1. List of Twitter official clients.** We also display the number of tweets originating from each official client. The number of tweets originating from official clients represent 92% of the total number of tweets.

| Hashtag        | Number of occurrences |
|----------------|-----------------------|
| trump          | 2 240 499             |
| trump2016      | 1 320 217             |
| maga           | 1 139 644             |
| hillary        | 905 065               |
| hillaryclinton | 718 159               |
| imwithher      | 690 519               |
| trumptrain     | 654 573               |
| neverhillary   | 634 562               |
| demsinphilly   | 627 446               |
| nevertrump     | 560 876               |
| tcot           | 531 389               |
| rencircle      | 498 718               |
| trump Pence16  | 473 924               |
| donaldtrump    | 409 708               |
| crookedhillary | 396 836               |

**Table S2. Top occurring hashtags from June 1st to September 1st 2016.**

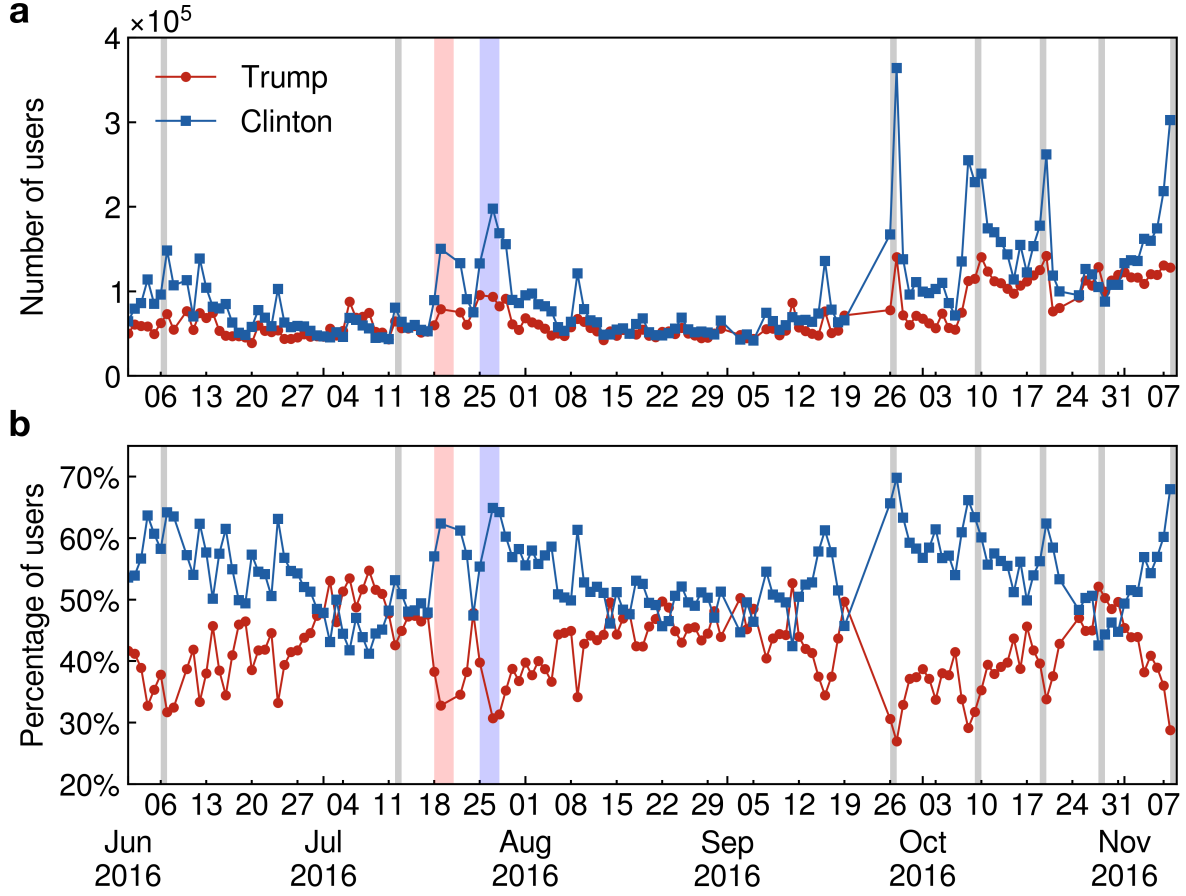

**Figure S2. Supporters in the filtered Twitter dataset.** (a) Absolute number and (b) percentage of users labeled as Trump (red) and as Clinton (blue) in the filtered dataset as a function of time. To assess the importance of the possible noise in the data induced by the popular “trump” and “hillary” keywords, we filter our dataset to keep only tweets with either one of the following keywords: ‘realdonaldtrump’, ‘hillaryclinton’, ‘donaldtrump’ or at least one of the following pairs of keywords ‘trump’ and ‘donald’ or ‘hillary’ and ‘clinton’. Although this keyword filtering reduces the dataset from 158 millions tweets to 58 millions tweets (considering only tweets from official clients), our results are not significantly changed. The relative number of each supporters and the temporal evolution of the number of users is similar to the results obtained from our full dataset.

| Associated with $C_C$ | Added to $C_C$   | Associated with $C_T$ | Added to $C_T$   |
|-----------------------|------------------|-----------------------|------------------|
| vote                  | strongertogether | radicalislam          | trumptrain       |
| republican            | donthecon        | ccot                  | trump Pence16    |
| america               | voteblue         | corruption            | vote trump       |
| hillaryclinton        | dumptrump        | ryan                  | hillno           |
| real                  | hillary2016      | fbi                   | handcuffhillary  |
| racist                | uniteblue        | hillary               | imnotwithher     |
| p2                    | clintonkaine2016 | tcot                  | vote trump 2016  |
| veep                  | hill yes         | jobs                  | crookedhillary   |
| trumpuniversity       | nevertrump Pence | tcot                  | hillaryforprison |
| kkk                   | chickentrump     | scotus                | maga             |

**Table S3. Example of hashtags discovered in the co-occurrence network.** We show hashtags associated with each class but not selected and hashtags selected as they directly reference one of the candidate or its party and express an opinion. The list of hashtags associated with each candidate shows how the hashtag co-occurrence network can be used to discover the topics commonly discussed by supporters of each camp.

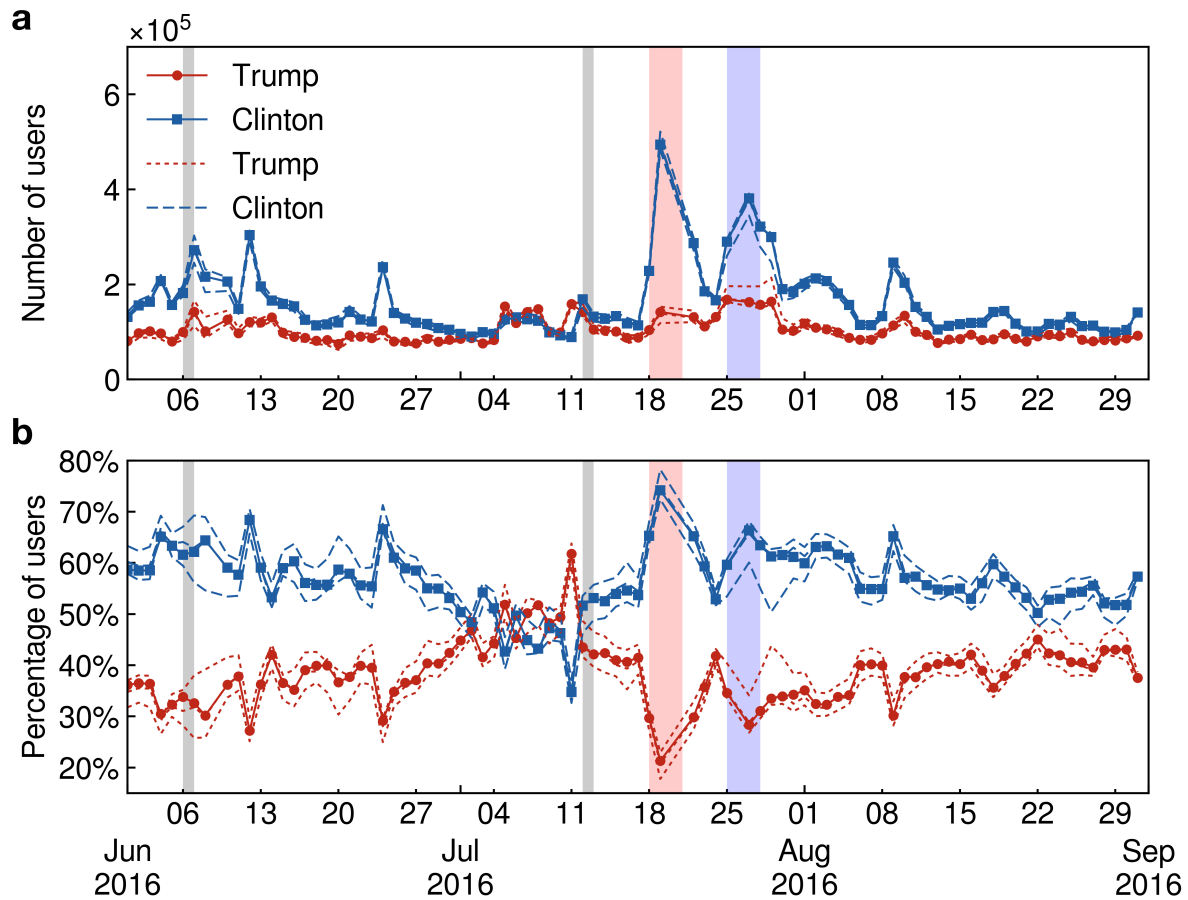

**Figure S3. Robustness test of the hashtag selection.** Comparison of absolute number of daily users (a) and percentage of users (b) using the full final set of hashtags (continuous lines) with results using three random subsets with 90% of the final set of hashtags (dotted and dashed lines) for the period from June 1st to September 1st. The root-mean-square deviation between the daily percentage of users found with the full set of hashtags and with the reduced set is  $\text{RMSD} = 2.7\%$ . These results show that our method is robust against variation in the manual selection of hashtags used to build the training set of tweets.

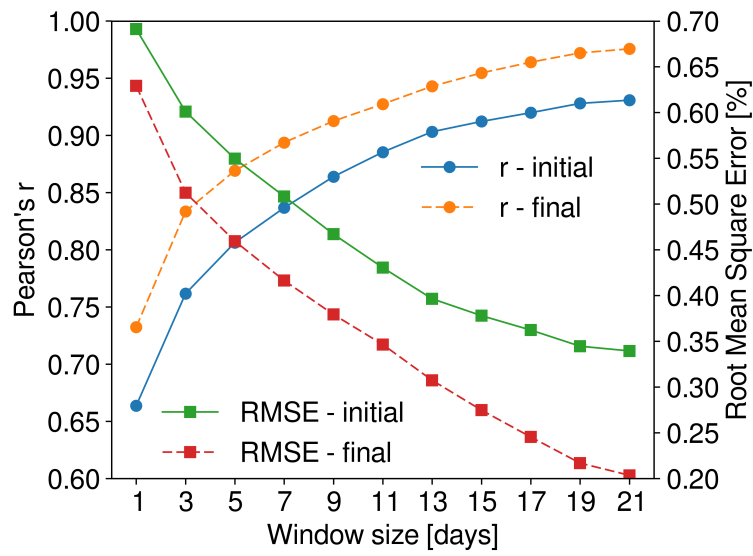

**Figure S4. Improvement of the quality of fit when using the final set of hashtags compared to the initial set.** Using the final set of hashtags for building our training set instead of the initial set improve the agreement between our Twitter opinion trend and the NYT Polling Average. This is shown by a larger Pearson's correlation coefficient ( $r$ , circles) and a lower root-mean-square error (RMSE, squares). When using a window length of 13 days, the Pearson correlation coefficient increases from  $r = 0.90$  to  $r = 0.94$  and the root-mean-square error decreases from  $\text{RMSE} = 0.40\%$  to  $\text{RMSE} = 0.31\%$ .

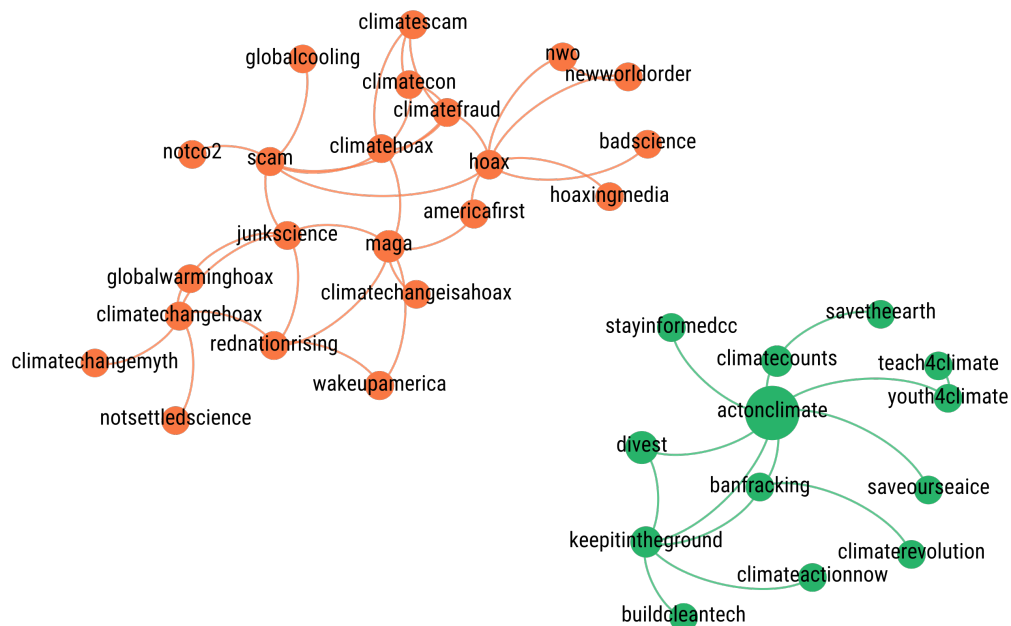

**Figure S5. Hashtag co-occurrence networks for climate change.** The network splits into two groups, one with hashtags supporting action toward climate change (green) and the other with hashtags depicting climate change as a hoax (orange). This result suggests that our machine learning and co-occurrence hashtag network method can be generalized to topics beyond the election setting.

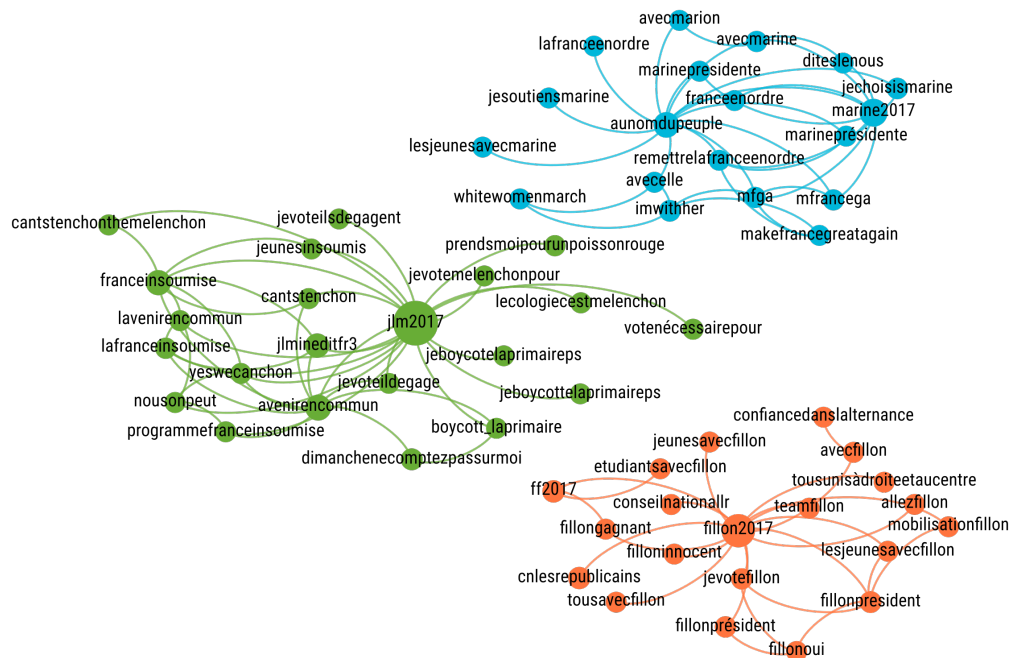

| pro-Clinton           | anti-Trump           | pro-Trump               | anti-Clinton                 |
|-----------------------|----------------------|-------------------------|------------------------------|
| bernwithher           | antitrump            | always trump            | clintoncorruption            |
| bluewave2016          | anyonebuttrump       | babesfortrump           | clintoncrime                 |
| clintonkaine2016      | boycotttrump         | bikers4trump            | clintoncrimefamily           |
| estoyconella          | chickentrump         | bikersfortrump          | clintoncrimefoundation       |
| herstory              | clowntrain           | blacks4trump            | corrupthillary               |
| heswithher            | crookeddonald        | buildthatwall           | criminalhillary              |
| hillaforia            | crookeddrumpf        | buildthewall            | crookedclinton               |
| hillary2016           | crookedtrump         | cafortrump              | crookedclintons              |
| hillaryforamerica     | crybabytrump         | democrats4trump         | crookedhillary               |
| hillaryforpr          | defeatrump           | donaldtrumpforpresident | crookedhiliary               |
| hillaryforpresident   | dirtydonald          | feelthetrump            | crookedhillary               |
| hillarysopresidential | donthecon            | feminineamerica4trump   | crookedhillaryclinton        |
| hillarysoqualified    | drumpf               | gays4trump              | deletehillary                |
| hillarystrong         | dumbdonald           | gaysfortrump            | dropouthillary               |
| hillstorm2016         | dumpthetrump         | gotrump                 | fbimwithher                  |
| hillyes               | dumptrump            | heswithus               | handcuffhillary              |
| hrc2016               | freethedelegates     | imwithhim               | heartlesshillary             |
| hrcisournominee       | lgbthatestrumpparty  | imwithyou               | hillary2jail                 |
| iamwithher            | loserdonald          | latinos4trump           | hillary4jail                 |
| imwithher             | losertrump           | latinosfortrump         | hillary4prison               |
| imwithher             | lovetrumpshate       | maga                    | hillary4prison2016           |
| imwithher2016         | lovetrumpshates      | makeamericagreat        | hillaryforprison             |
| imwithhillary         | lyindonald           | makeamericagreatagain   | hillaryforprison2016         |
| imwiththem            | lyingdonald          | makeamericasaftagain    | hillaryliedpeople died       |
| itruster              | lyingtrump           | makeamericaworkagain    | hillarylies                  |
| itrusthillary         | lyintrump            | onlytrump               | hillaryliesmatter            |
| madamepresident       | makedonaldtrumpagain | presidenttrump          | hillarylostme                |
| madampresident        | nevergop             | rednationrising         | hillaryrottenclinton         |
| momsdemandhillary     | nevertrump           | trump16                 | hillarysolympics             |
| ohhillyes             | nevertrumpence       | trump2016               | hillno                       |
| readyforhillary       | nodonaldtrump        | trumpcares              | hypocritehillary             |
| republicans4hillary   | notrump              | trumpforpresident       | imnotwithher                 |
| republicansforhillary | notrumpanytime       | trumpiswithyou          | indichillary                 |
| sheswithus            | poordonald           | trumpence16             | iwillneverstandwithher       |
| standwithmadampotus   | racistrump           | trumpence2016           | killary                      |
| strongertogether      | releasethereturns    | trumpstrong             | lockherup                    |
| uniteblue             | releaseyourtaxes     | trumptrain              | lyingcrookedhillary          |
| vote4hillary          | ripnop               | veteransfortrump        | lyinghillary                 |
| voteblue              | showusyourtaxes      | vets4trump              | lyinhillary                  |
| voteblue2016          | sleazydonald         | votegop                 | moretrustedthanhillary       |
| votehillary           | stoptrump            | votetrump               | neverclinton                 |
| welovehillary         | stupidtrump          | votetrump2016           | nevereverhillary             |
| yeswekaine            | traitortrump         | votetrumpence2016       | neverhillary                 |
|                       | treasonoustrump      | woman4trump             | nohillary2016                |
|                       | trump20never         | women4trump             | nomoreclintons               |
|                       | trumpies             | womenfortrump           | notwithher                   |
|                       | trumpiesmatter       |                         | ohhillno                     |
|                       | trumpsopoor          |                         | releasethetranscripts        |
|                       | trumpthefraud        |                         | riskyhillary                 |
|                       | trumptrainwreck      |                         | shelies                      |
|                       | trumptreason         |                         | sickhillary                  |
|                       | unfittrump           |                         | stophillary                  |
|                       | weakdonald           |                         | stophillary2016              |
|                       | wherertrumpstaxes    |                         | theclintoncontamination      |
|                       | wheresyourtaxes      |                         | wehatehillary                |
|                       | whynilittlebitch     |                         | whatmakeshillaryshortcircuit |
|                       | womentrumpdonald     |                         |                              |

**Table S4. List of hashtags used for labeling the tweet training set from June 1st to September 1st.**

| pro-Clinton           | anti-Trump       | pro-Trump             | anti-Clinton           |
|-----------------------|------------------|-----------------------|------------------------|
| bluewave              | chickentump      | always trump          | billclintonisrapist    |
| bluewave2016          | clowntrain       | america1st            | clintoncollapse        |
| clintonkaine2016      | crookeddonald    | americafirst          | clintoncorruption      |
| connecttheleft        | crookedtrump     | blacks4trump          | clintoncrimefamily     |
| estoyconella          | defeattrump      | blacksfortrump        | clintoncrimefoundation |
| hereiamwithher        | dirtydonald      | buildthewall          | corruptclintons        |
| herstory              | donthecon        | deplorablesfortrump   | corrupthillary         |
| heswithher            | dumbdonald       | draintheswamp         | criminalhillary        |
| hillary2016           | dumpthetrump     | gaysfortrump          | crookedclinton         |
| hillaryaprovenleader  | loserdonald      | imwithhim             | crookedhillary         |
| hillaryforamerica     | losertrump       | imwithyou             | crookedhillary         |
| hillaryforpresident   | lovetrumpshate   | latinosfortrump       | democratliesmatter     |
| hillyes               | lyingtrump       | latinoswithtrump      | dropouthillary         |
| iamwithher            | lyintrump        | maga                  | hillary2jail           |
| imwithher             | nastywoman       | maga3x                | hillary4prison         |
| imwithher2016         | nastywomen       | magax3                | hillaryforprison       |
| madamepresident       | nastywomenvote   | makeamericagreatagain | hillaryforprison2016   |
| madampresident        | nevergop         | makeamericasaagain    | hillarylies            |
| ohhillies             | nevertrump       | onlytrump             | hillaryliesmatter      |
| republicansforhillary | orangehitler     | rednationrising       | imnotwithher           |
| sheswithus            | racisttrump      | securetheborder       | indiethillary          |
| strongertogether      | ripgop           | trump2016             | killary                |
| turnncblue            | stoptrump        | trumpforpresident     | lockherup              |
| uniteblue             | trump20never     | trump Pence16         | lyingcrookedhillary    |
| unitedagainststhat    | trumpleaks       | trump Pence2016       | lyinghillary           |
| voteblue              | trumplies        | trumpstrong           | neverhillary           |
| voteblue2016          | whinylittlebitch | trumptrain            | neverhillary           |
| votehillary           |                  | trumpwins             | ohhillno               |
| wearewithher          |                  | trumpwon              | queenofcorruption      |
| werewithher           |                  | veteransfortrump      | queenofcorrupton       |
| whyimwithher          |                  | votegop               | sickhillary            |
|                       |                  | votetrump             |                        |
|                       |                  | votetrump2016         |                        |
|                       |                  | votetrump Pence       |                        |
|                       |                  | votetrump Pence16     |                        |
|                       |                  | votetrumpusa          |                        |
|                       |                  | women4trump           |                        |
|                       |                  | womenfortrump         |                        |

**Table S5. List of hashtags used for labeling the tweet training set from September 1st to November 8th.**
